# Supplementary material for: Drivers of Inter-individual Variation in Dengue Viral Load Dynamics
Source: PubMed Central journal article supplement (PMC5113863; doi:10.1371/journal.pcbi.1005194), 2016-11-17
Supplement: pcbi.1005194.s009.pdf [file pcbi.1005194.s009.pdf]

**S1 Table: Parameter estimates for model 1 fit to individuals who received placebo or chloroquine. Median marginal posterior parameter estimates are reported, with 95 % posterior credible intervals for each parameter in parentheses. Units are the same as in Table 1 in the main text.**

| Model       | $\log V_0$        | $\beta(\times 10^{-10})$ | $\kappa$       | $q(\times 10^{-4})$ | $q_T(\times 10^{-6})$ | $\log \sigma_I$ |
|-------------|-------------------|--------------------------|----------------|---------------------|-----------------------|-----------------|
| Placebo     | -0.46 (-3.7, 1.6) | 3.5 (2.7, 5.0)           | 4.6 (3.8, 6.1) | 4.8 (3.5, 7.3)      | .81 (.65, 1.1)        | .21 (.18, .24)  |
| Chloroquine | -1.1 (-3.1, 0.34) | 3.6 (3.0, 4.7)           | 5.4 (4.4, 7.1) | 7.6 (5.4, 11.0)     | 1.0 (.74, 1.5)        | .18 (.16, .21)  |
