# Supplementary material for: Drivers of Inter-individual Variation in Dengue Viral Load Dynamics
Source: PubMed Central journal article supplement (PMC5113863; doi:10.1371/journal.pcbi.1005194), 2016-11-17
Supplement: pcbi.1005194.s010.pdf [file pcbi.1005194.s010.pdf]

**S2 Table: Parameter estimates for models fit to full dataset. Median marginal posterior parameter estimates are reported, with 95 % posterior credible intervals for each parameter in parentheses. Units are the same as in Table 1 in the main text.**

| Model                         | $\log V_0$        | $\beta(\times 10^{-10})$                                                                                                                                                                                                                                                                        | $\kappa$       | $q(\times 10^{-4})$                                                                                  | $q_T(\times 10^{-6})$                                                                                   | $\log \sigma_I$ | $\delta_{T_{DF}}(\times 10^{-6})$ |
|-------------------------------|-------------------|-------------------------------------------------------------------------------------------------------------------------------------------------------------------------------------------------------------------------------------------------------------------------------------------------|----------------|------------------------------------------------------------------------------------------------------|---------------------------------------------------------------------------------------------------------|-----------------|-----------------------------------|
| 0                             | -7.7 (-8.9, -6.6) | 6.7(6.2, 7.3)                                                                                                                                                                                                                                                                                   | 4.6 (4.3, 4.9) | 14(13, 16)                                                                                           | –                                                                                                       | .20 (.18, .22)  | –                                 |
| OAS <sub>1</sub>              | -3.1 (-4.7, -1.8) | 4.5 (4, 5.2)                                                                                                                                                                                                                                                                                    | 5.2 (4.8, 5.8) | 6.5 (5.5, 7.75)                                                                                      | 1.0 (.90, 1.2)                                                                                          | .20 (.18, .22)  | 1.1 (1.0, 1.7)                    |
| OAS <sub>2</sub>              | -3.2 (-4.8, -1.8) | 4.6 (4.0, 5.3)                                                                                                                                                                                                                                                                                  | 5.2 (4.8, 5.9) | 6.5 (5.5, 7.7)                                                                                       | DF: .97 (.83, 1.2)<br>DHF: 1.1 (0.95, 1.4)                                                              | .20 (.18, .22)  | 1.2 (1.0, 2.1)                    |
| ADE                           | -3.3 (-4.9, -1.9) | DF: 4.6 (4.0, 5.3)<br>DHF: 4.7 (4.1, 5.5)                                                                                                                                                                                                                                                       | 5.2 (4.8, 5.9) | 6.5 (5.5, 7.8)                                                                                       | 1.0 (.90, 1.2)                                                                                          | .2 (.18, .22)   | –                                 |
| SS <sub>q</sub>               | -3.3 (-5.4, -1.8) | 4.6 (4.0, 5.6)                                                                                                                                                                                                                                                                                  | 5.2 (4.7, 5.9) | q <sub>1</sub> : 6.7 (5.4, 8.5)<br>q <sub>2</sub> : 7.3 (5.7, 10)<br>q <sub>3</sub> : 5.4 (4.2, 7.5) | 1 (8.8, 1.2)                                                                                            | 0.2 (.18, .22)  | –                                 |
| SS <sub>q<sub>T</sub></sub>   | -2.9 (-4.3, -1.7) | 4.3 (3.9, 4.9)                                                                                                                                                                                                                                                                                  | 5.3 (4.9, 5.8) | 6.9 (5.8, 8.4)                                                                                       | q <sub>T1</sub> : 1.0 (.9, 1.2)<br>q <sub>T2</sub> : 1.7 (1.1, 3.2)<br>q <sub>T3</sub> : 2.0 (1.3, 3.4) | .19 (.17, .21)  | –                                 |
| SS <sub>β<sub>ADE</sub></sub> | -3.7 (-5.3, -2.3) | β <sub>1<sub>DF</sub></sub> : 4.5 (4.0, 5.3)<br>β <sub>2<sub>DF</sub></sub> : 5.2 (4.4, 6.1)<br>β <sub>3<sub>DF</sub></sub> : 5.2 (4.4, 6.1)<br>β <sub>1<sub>DHF</sub></sub> : 4.6 (4.0, 5.4)<br>β <sub>2<sub>DHF</sub></sub> : 5.3 (4.6, 6.3)<br>β <sub>3<sub>DHF</sub></sub> : 5.4 (4.6, 6.4) | 5.1 (4.7, 5.7) | 6.6 (5.6, 7.9)                                                                                       | 1.0 (.9, 1.2)                                                                                           | .19 (.17, .21)  | –                                 |
