# Supplementary material for: Drivers of Inter-individual Variation in Dengue Viral Load Dynamics
Source: PubMed Central journal article supplement (PMC5113863; doi:10.1371/journal.pcbi.1005194), 2016-11-17
Supplement: pcbi.1005194.s011.pdf [file pcbi.1005194.s011.pdf]

**S3 Table: Parameter estimates for models fit to subset of data with detected viral peaks. Median marginal posterior parameter estimates are reported, with 95 % posterior credible intervals for each parameter in parentheses. Units are the same as in Table 4 in the main text.  $V_0 = 10^{-3.2}$  copies/cell.**

| Model              | $IP_g$         | $\beta(\times 10^{-10})$                                                                                                                                                                                                      | $\kappa$       | $q(\times 10^{-4})$ | $q_T(\times 10^{-6})$                                                                 | $\log \sigma_I$ |
|--------------------|----------------|-------------------------------------------------------------------------------------------------------------------------------------------------------------------------------------------------------------------------------|----------------|---------------------|---------------------------------------------------------------------------------------|-----------------|
| 1                  | 5.8 (5.0, 6.8) | 4.0(3.5, 4.7)                                                                                                                                                                                                                 | 4.7 (4.3, 5.4) | 6.2(4.9, 8.1)       | .97 (.82, 1.2)                                                                        | .15 (.12, .19)  |
| ADE                | 5.6 (4.8, 6.5) | DF: 4.0 (3.5, 4.7)<br>DHF: 4.5 (3.8, 5.5)                                                                                                                                                                                     | 4.7 (4.3, 5.4) | 6.5 (5.2, 8.6)      | .95 (.81, 1.2)                                                                        | .15 (.12, .18)  |
| $SS_\beta$         | 5.6 (4.9, 6.5) | $\beta_1$ : 3.9 (3.4, 4.6)<br>$\beta_2$ : 4.9 (4.0, 6.0)<br>$\beta_3$ : 4.7 (3.8, 5.9)                                                                                                                                        | 4.8 (4.3, 5.4) | 6.5 (5.1, 8.5)      | 1.0 (.08, 1.2)                                                                        | .14 (.11, .18)  |
| $SS_{q_T}$         | 5.8 (5.0, 6.7) | 4.0 (3.4, 4.6)                                                                                                                                                                                                                | 4.9 (4.5, 5.5) | 6.7 (5.3, 8.8)      | $q_{T_1}$ : .94 (.80, 1.2)<br>$q_{T_2}$ : 2.5 (1.3, 6.2)<br>$q_{T_3}$ : 4.1 (1.3, 12) | .14 (.12, .18)  |
| $SS_{\beta_{ADE}}$ | 5.3 (4.5, 6.1) | $\beta_{1_{DF}}$ : 4.1 (3.6, 4.8)<br>$\beta_{2_{DF}}$ : 4.9 (4.1, 5.9)<br>$\beta_{3_{DF}}$ : 4.8 (3.9, 6.4)<br>$\beta_{1_{DHF}}$ : 4.4 (3.7, 5.4)<br>$\beta_{2_{DHF}}$ : 5.7 (4.6, 7.4)<br>$\beta_{3_{DHF}}$ : 5.7 (4.4, 7.8) | 4.6 (4.2, 5.3) | 6.7 (5.3, 8.7)      | .09 (.08, 1.1)                                                                        | .15 (.12, .19)  |
