# Supplementary material for: Drivers of Inter-individual Variation in Dengue Viral Load Dynamics
Source: PubMed Central journal article supplement (PMC5113863; doi:10.1371/journal.pcbi.1005194), 2016-11-17
Supplement: pcbi.1005194.s013.pdf [file pcbi.1005194.s013.pdf]

**S5 Table: Model comparisons when  $T_0$  is varied 1/2 and 2 times its set point estimate used in Table 1 in the main text. Median log-likelihood values, BIC and DIC values for all models considered are reported.**

| Model                                      | Log-likelihood | BIC  | DIC  |
|--------------------------------------------|----------------|------|------|
| Low value: $T_0 = 5 \times 10^4$ cells/ml  |                |      |      |
| 1                                          | -2341          | 4857 | 4723 |
| $OAS_1$                                    | -2342          | 4731 | 4690 |
| $OAS_2$                                    | -2341          | 4736 | 4690 |
| $ADE$                                      | -2376          | 4731 | 4689 |
| $SS_\beta$                                 | -2328          | 4711 | 4663 |
| $SS_q$                                     | -2340          | 4735 | 4688 |
| $SS_{qT}$                                  | -2333          | 4720 | 4672 |
| $SS_{\beta ADE}$                           | -2330          | 4735 | 4669 |
| High value: $T_0 = 2 \times 10^5$ cells/ml |                |      |      |
| 1                                          | -2352          | 4746 | 4710 |
| $OAS_1$                                    | -2353          | 4754 | 4713 |
| $OAS_2$                                    | -2353          | 4759 | 4712 |
| $ADE$                                      | -2352          | 4753 | 4711 |
| $SS_\beta$                                 | -2338          | 4732 | 4685 |
| $SS_q$                                     | -2352          | 4758 | 4711 |
| $SS_{qT}$                                  | -2342          | 4740 | 4693 |
| $SS_{\beta ADE}$                           | -2341          | 4757 | 4691 |
