# Supplementary material for: Drivers of Inter-individual Variation in Dengue Viral Load Dynamics
Source: PubMed Central journal article supplement (PMC5113863; doi:10.1371/journal.pcbi.1005194), 2016-11-17
Supplement: pcbi.1005194.s014.pdf [file pcbi.1005194.s014.pdf]

**S6 Table: Model comparisons when  $\omega$  is varied 1/2 and 2 times its set point estimate used in Table 1 in the main text. Median log-likelihood values, BIC and DIC values for all models considered are reported.**

| Model                                            | Log-likelihood | BIC  | DIC  |
|--------------------------------------------------|----------------|------|------|
| Low value: $\omega = 5 \times 10^3$ copies/cell  |                |      |      |
| 0                                                | -2452          | 4938 | 4909 |
| 1                                                | -2376          | 4793 | 4758 |
| $OAS_1$                                          | -2377          | 4801 | 4760 |
| $OAS_2$                                          | -2376          | 4806 | 4759 |
| $ADE$                                            | -2376          | 4800 | 4759 |
| $SS_\beta$                                       | -2362          | 4778 | 4731 |
| $SS_q$                                           | -2376          | 4806 | 4760 |
| $SS_{qT}$                                        | -2366          | 4787 | 4740 |
| $SS_{\beta ADE}$                                 | -2364          | 4803 | 4737 |
| High value: $\omega = 2 \times 10^4$ copies/cell |                |      |      |
| 0                                                | -2393          | 4821 | 4792 |
| 1                                                | -2336          | 4714 | 4678 |
| $OAS_1$                                          | -2337          | 4722 | 4680 |
| $OAS_2$                                          | -2336          | 4728 | 4679 |
| $ADE$                                            | -2336          | 4721 | 4679 |
| $SS_\beta$                                       | -2324          | 4703 | 4655 |
| $SS_q$                                           | -2335          | 4724 | 4675 |
| $SS_{qT}$                                        | -2326          | 4708 | 4660 |
| $SS_{\beta ADE}$                                 | -2326          | 4728 | 4660 |
