# Supplementary material for: Drivers of Inter-individual Variation in Dengue Viral Load Dynamics
Source: PubMed Central journal article supplement (PMC5113863; doi:10.1371/journal.pcbi.1005194), 2016-11-17
Supplement: pcbi.1005194.s015.pdf [file pcbi.1005194.s015.pdf]

**S7 Table: Model comparisons when  $1/d$  is varied 1/2 and 2 times its set point estimate used in Table 1 in the main text. Median log-likelihood values, BIC and DIC values for all models considered are reported.**

| Model                             | Log-likelihood | BIC  | DIC  |
|-----------------------------------|----------------|------|------|
| Low value: $d = 0.035/\text{day}$ |                |      |      |
| 0                                 | -2396          | 4826 | 4797 |
| 1                                 | -2334          | 4709 | 4674 |
| $OAS_1$                           | -2335          | 4717 | 4676 |
| $OAS_2$                           | -2334          | 4722 | 4675 |
| $ADE$                             | -2334          | 4717 | 4675 |
| $SS_\beta$                        | -2321          | 4698 | 4650 |
| $SS_q$                            | -2333          | 4721 | 4675 |
| $SS_{qT}$                         | -2325          | 4706 | 4658 |
| $SS_{\beta ADE}$                  | -2324          | 4722 | 4656 |
| High value: $d = 0.14/\text{day}$ |                |      |      |
| 0                                 | -2444          | 4922 | 4893 |
| 1                                 | -2374          | 4789 | 4754 |
| $OAS_1$                           | -2375          | 4798 | 4757 |
| $OAS_2$                           | -2375          | 4803 | 4756 |
| $ADE$                             | -2374          | 4797 | 4755 |
| $SS_\beta$                        | -2359          | 4773 | 4726 |
| $SS_q$                            | -2374          | 4802 | 4756 |
| $SS_{qT}$                         | -2364          | 4783 | 4736 |
| $SS_{\beta ADE}$                  | -2361          | 4797 | 4732 |
