# Supplementary material for: Drivers of Inter-individual Variation in Dengue Viral Load Dynamics
Source: PubMed Central journal article supplement (PMC5113863; doi:10.1371/journal.pcbi.1005194), 2016-11-17
Supplement: pcbi.1005194.s016.pdf [file pcbi.1005194.s016.pdf]

**S8 Table: Model comparisons when  $1/d_T$  is varied 1/2 and 2 times its set point estimate used in Table 1 in the main text. Median log-likelihood values, BIC and DIC values for all models considered are reported.**

| Model                              | Log-likelihood | BIC  | DIC  |
|------------------------------------|----------------|------|------|
| Low value: $d_T = .05/\text{day}$  |                |      |      |
| 0                                  | -2411          | 4857 | 4828 |
| 1                                  | -2342          | 4725 | 4690 |
| $OAS_1$                            | -2343          | 4734 | 4692 |
| $OAS_2$                            | -2342          | 4739 | 4691 |
| $ADE$                              | -2342          | 4733 | 4691 |
| $SS_\beta$                         | -2329          | 4713 | 4666 |
| $SS_q$                             | -2341          | 4738 | 4691 |
| $SS_{qT}$                          | -2333          | 4721 | 4674 |
| $SS_{\beta ADE}$                   | -2331          | 4738 | 4671 |
| High value: $d_T = 0.2/\text{day}$ |                |      |      |
| 0                                  | -2411          | 4857 | 4828 |
| 1                                  | -2353          | 4748 | 4713 |
| $OAS_1$                            | -2355          | 4757 | 4716 |
| $OAS_2$                            | -2354          | 4762 | 4715 |
| $ADE$                              | -2354          | 4756 | 4715 |
| $SS_\beta$                         | -2339          | 4734 | 4687 |
| $SS_q$                             | -2353          | 4761 | 4714 |
| $SS_{qT}$                          | -2344          | 4743 | 4695 |
| $SS_{\beta ADE}$                   | -2342          | 4758 | 4693 |
